# Supplementary material for: Prepared to Accompany the End of Life during Pandemics in Nursing Homes
Source: MDPI journal article supplement (doi:10.3390/jcm11206075), 2022-10-14
Supplement: s1 [file s1]

Supplementary Table S1: content of the PallPan recommendations according to Gauder [11] and selected recommendations for nursing homes (x)

| Section                                                                                                | PallPan recommendations                                                                                                                                                                                                                                                                                                                                                                                                                                                                                                                                                                                                                                                                                                            |
|--------------------------------------------------------------------------------------------------------|------------------------------------------------------------------------------------------------------------------------------------------------------------------------------------------------------------------------------------------------------------------------------------------------------------------------------------------------------------------------------------------------------------------------------------------------------------------------------------------------------------------------------------------------------------------------------------------------------------------------------------------------------------------------------------------------------------------------------------|
| <b>1—Supporting patients and relatives</b>                                                             |                                                                                                                                                                                                                                                                                                                                                                                                                                                                                                                                                                                                                                                                                                                                    |
| <b>1a—Ensuring palliative care for infected and non-infected individuals</b>                           |                                                                                                                                                                                                                                                                                                                                                                                                                                                                                                                                                                                                                                                                                                                                    |
|                                                                                                        | <p>1: Provision of best possible care for infected and non-infected severely ill and dying patients and their relatives (x)</p> <p>2: Integration of the expertise and resources of specialist palliative care in the treatment process (x)</p> <p>3: Recognition of the risk of loneliness of infected severely ill and dying people and avoidance of stigma and undersupply of patients (x)</p> <p>4: Offering palliative care when making prioritization decisions (x)</p> <p>5: Consideration of palliative care patients' concerns in prioritization concepts (x)</p>                                                                                                                                                         |
| <b>1b—Documenting and respecting patient's will</b>                                                    |                                                                                                                                                                                                                                                                                                                                                                                                                                                                                                                                                                                                                                                                                                                                    |
|                                                                                                        | <p>6: Offering early conversations about goals of care and treatment preferences for severely ill patients or at risk for a severe infection course (x)</p> <p>7: Documenting and respecting patient's will (x)</p>                                                                                                                                                                                                                                                                                                                                                                                                                                                                                                                |
| <b>1c—Ensuring visits and proximity between patients and relatives</b>                                 |                                                                                                                                                                                                                                                                                                                                                                                                                                                                                                                                                                                                                                                                                                                                    |
|                                                                                                        | <p>8: Balancing the individual needs of patients with the protection of the public from infection (x)</p> <p>9: Enabling visiting and company of relatives (x)</p> <p>10: Creation of separate regulations for patients receiving palliative care when establishing contact restrictions (x)</p> <p>11: In case of general visiting restrictions, creation of separate visiting concepts for severely ill and dying patients and their relatives (x)</p> <p>12: Provision of sufficient protective equipment and personnel for visits by relatives (x)</p> <p>13: In case of visiting restrictions, offering of intensified company by staff, chaplains, and volunteers (x)</p> <p>14: Provision of means of communication (x)</p> |
| <b>1d—Ensuring exchange of information and communication between professional carers and relatives</b> |                                                                                                                                                                                                                                                                                                                                                                                                                                                                                                                                                                                                                                                                                                                                    |
|                                                                                                        | <p>15: Regular contacting of relatives by professional carers (x)</p> <p>16: Informing relatives and patients about regulations (x)</p>                                                                                                                                                                                                                                                                                                                                                                                                                                                                                                                                                                                            |
| <b>1e—Enabling farewell after death</b>                                                                |                                                                                                                                                                                                                                                                                                                                                                                                                                                                                                                                                                                                                                                                                                                                    |
|                                                                                                        | <p>17: Enabling farewells to be said to the deceased (x)</p>                                                                                                                                                                                                                                                                                                                                                                                                                                                                                                                                                                                                                                                                       |

|                                                                                                                                                    |                                                                                                                                                                                                                                                                                                                                                                                                                                                                                             |
|----------------------------------------------------------------------------------------------------------------------------------------------------|---------------------------------------------------------------------------------------------------------------------------------------------------------------------------------------------------------------------------------------------------------------------------------------------------------------------------------------------------------------------------------------------------------------------------------------------------------------------------------------------|
|                                                                                                                                                    | 18: Enabling participation in funerals<br>19: Offering bereavement support(x)                                                                                                                                                                                                                                                                                                                                                                                                               |
| <b>2—Supporting staff</b>                                                                                                                          |                                                                                                                                                                                                                                                                                                                                                                                                                                                                                             |
|                                                                                                                                                    | 20: Ensuring infection prevention for staff (x)<br>21: Informing staff regularly about the pandemic situation and current regulations (x)<br>22: Encouraging staff for regular feedback to responsible persons about their problems and needs (x)<br>23: Training of staff in the treatment and care of the seriously ill and dying (x)<br>24: Establishing low-threshold support for staff (x)<br>25: Establishing opportunities for interdisciplinary and multi-professional exchange (x) |
| <b>3—Supporting and maintaining structures and provision of palliative care</b>                                                                    |                                                                                                                                                                                                                                                                                                                                                                                                                                                                                             |
| <b>3a—Maintaining palliative care services</b>                                                                                                     |                                                                                                                                                                                                                                                                                                                                                                                                                                                                                             |
|                                                                                                                                                    | 26: Maintaining existing generalist and specialist palliative care services and structures<br>27: Exploring the need for expansion or new creation of palliative care provision<br>28: Providing preconditions and the framework for digital communication (x)                                                                                                                                                                                                                              |
| <b>3b—Integrating palliative care aspects into federal and state governments and local administrations (incl. crisis teams and pandemic plans)</b> |                                                                                                                                                                                                                                                                                                                                                                                                                                                                                             |
|                                                                                                                                                    | 29: Providing additional short-term financial resources for the care of severely ill and dying people<br>30: Naming and including palliative care experts in the development and implementation of pandemic plans<br>31: Naming and including palliative care experts in crisis teams<br>32: Networking of palliative and hospice services during the pandemic<br>33: Naming contact persons responsible for palliative care issues in public authorities                                   |
|                                                                                                                                                    |                                                                                                                                                                                                                                                                                                                                                                                                                                                                                             |

Gauder, S., Pralong, A., Rémi, C., Hodiamont, F., Klinger, I., Heckel, M., Simon, S. T., & Bausewein, C. (2022). Development of a national strategy with recommendations for the care of seriously ill and dying people and their relatives in pandemics: A modified Delphi study. *Palliat Med*, 36(8), 1285-1295. <https://doi.org/10.1177/02692163221114536>
